# Supplementary material for: Anticodon-like binding of the HIV-1 tRNA-like element to human lysyl-tRNA synthetase
Source: PubMed Central journal article supplement — RNA. 2016 Dec;22(12):1828–35. doi: 10.1261/rna.058081.116 (PMC5113203; doi:10.1261/rna.058081.116), 2016-12
Supplement: supp_058081.116_Supplemental_Fig_S1.pdf [file supp_058081.116_Supplemental_Fig_S1.pdf]

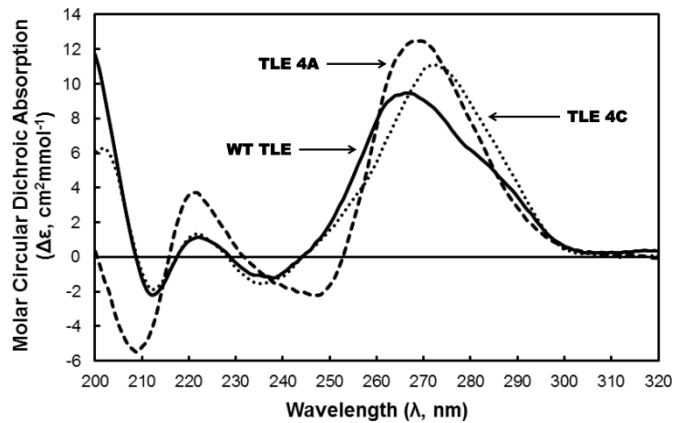

Figure S1. Circular dichroism (CD) spectra of WT TLE, TLE 4C and TLE 4A indicating that all three possess A-form helical duplex structure in solution. RNAs were folded in a buffer containing 20 mM Tris-HCl, pH 8, and 75 mM KCl. The final  $OD_{260}$  of the RNAs was in the range of 0.3 to 0.5 and samples (300  $\mu$ L) of the folded RNAs were aliquoted into 1 mm path-length quartz cuvettes prior to collection of CD data using a Jasco J-815 spectrometer. Data for buffer alone was also recorded for baseline subtraction. Each of the samples was scanned 5 times to collect the raw CD amplitude and the average was used to calculate the molar circular dichroic absorption shown here.
