# Supplementary material for: Anticodon-like binding of the HIV-1 tRNA-like element to human lysyl-tRNA synthetase
Source: PubMed Central journal article supplement — RNA. 2016 Dec;22(12):1828–35. doi: 10.1261/rna.058081.116 (PMC5113203; doi:10.1261/rna.058081.116), 2016-12
Supplement: supp_058081.116_Supplemental_Fig_S2.pdf [file supp_058081.116_Supplemental_Fig_S2.pdf]

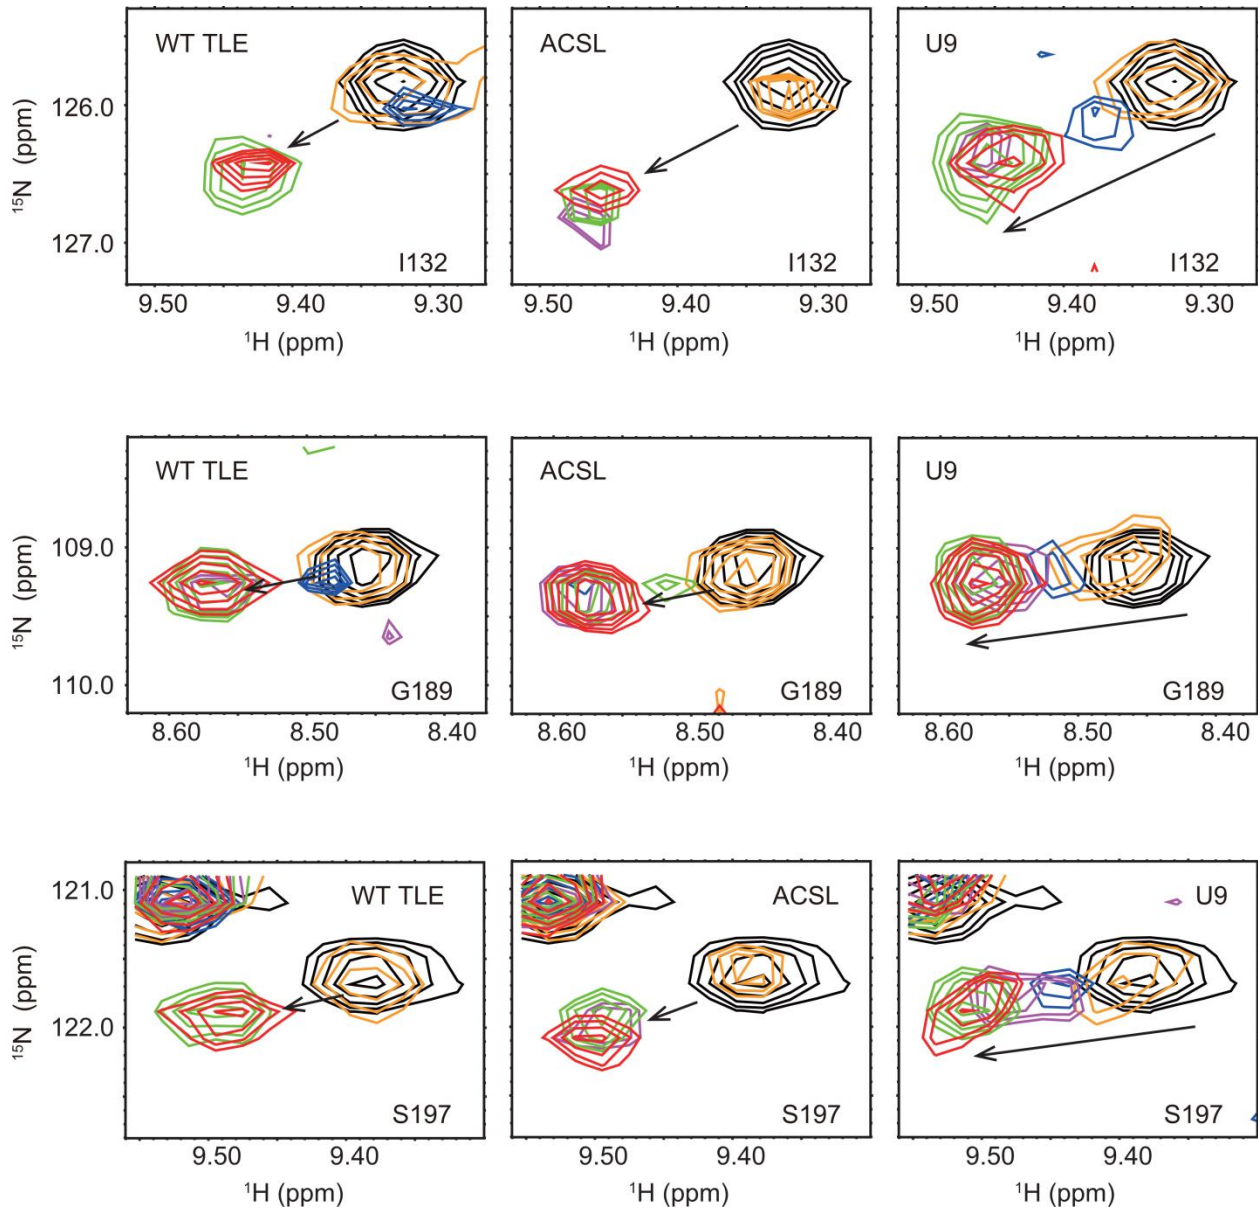

Figure S2. Slow and moderately fast exchange binding effects due to ACSL binding to WT TLE, ACSL and U9. The ratios of RNA to ACSL protein used were 0:1 (black), 0.1:1 (orange), 0.3:1 (blue), 0.6:1 (magenta), 1.0:1 (green) and 1.2:1 (red) for all three RNAs. I132 (top panels), G189 (middle panels) and S197 (bottom panels) are selected to show slow exchange examples in WT TLE and ACSL titration experiments. These three

resonances undergo moderately fast exchange in titration experiments with U9 RNA.

Arrows indicate the slow or fast exchange shift direction.
