# Supplementary material for: Anticodon-like binding of the HIV-1 tRNA-like element to human lysyl-tRNA synthetase
Source: PubMed Central journal article supplement — RNA. 2016 Dec;22(12):1828–35. doi: 10.1261/rna.058081.116 (PMC5113203; doi:10.1261/rna.058081.116), 2016-12
Supplement: supp_058081.116_Supplemental_Fig_S3.pdf [file supp_058081.116_Supplemental_Fig_S3.pdf]

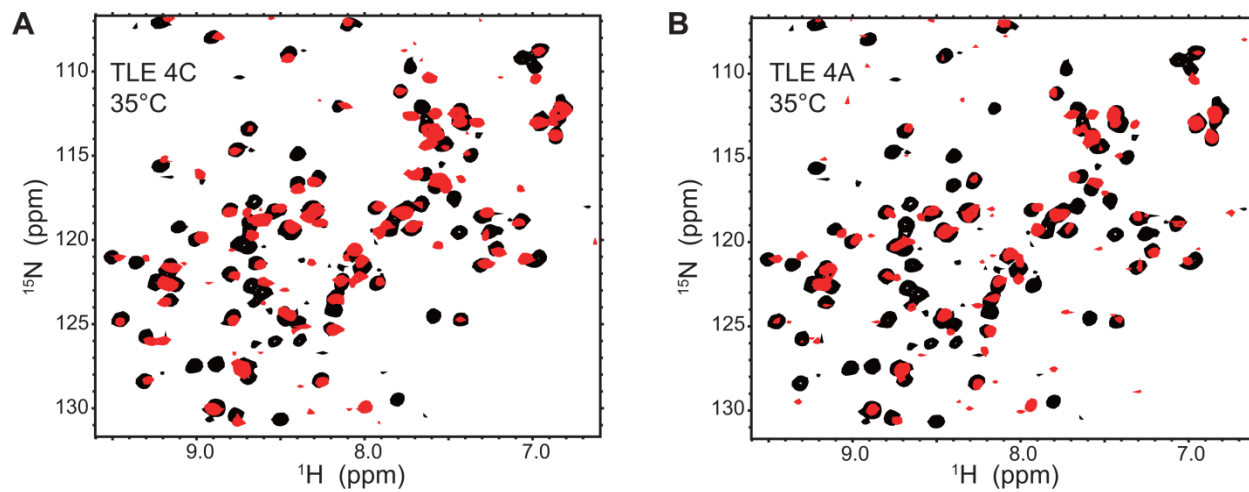

Figure S3. Comparison of the 35 °C HSQC NMR spectra of the free ACB (black) vs. ACB in the presence of TLE 4C (panel A, red) and TLE 4A (panel B, red).
